# Supplementary material
Source: publisher figshare collection journal article supplement (https://acs.figshare.com/ndownloader/files/8853973)
Supplement: Supplementary file 1 [file 8853973]

Supporting information

**Engineering the Aromaticity of Cationic Helical  
Polypeptides toward “Self-Activated” DNA/siRNA  
Delivery**

Fangfang Li,<sup>a,1</sup> Yongjuan Li,<sup>a,1</sup> Zhuchao Zhou,<sup>b,1</sup> Shixian Lv,<sup>a</sup> Qiurong Deng,<sup>a</sup> Xin Xu,  
<sup>a</sup> Lichen Yin<sup>a,\*</sup>

<sup>a</sup>Jiangsu Key Laboratory for Carbon-Based Functional Materials and Devices, Institute of Functional Nano and Soft Materials (FUNSOM), Soochow University, Suzhou 215123, P.R. China.

<sup>b</sup>Department of General Surgery, Huashan Hospital, Fudan University, Shanghai 200040, China

\*Corresponding authors:

Email: [lcyin@suda.edu.cn](mailto:lcyin@suda.edu.cn) (Yin L); Phone: 86-512-65882039;

<sup>1</sup> These authors contributed equally.

## 1. Instrumentation.

$^1\text{H}$  NMR spectra were recorded on a Varian U400 MHz spectrometer. Gel permeation chromatography (GPC) experiments were conducted on a system equipped with an isocratic pump (Model 1260, Agilent Technology), a multi-angle laser light scattering (MALLS) detector (Agilent Technology), and a refractive index detector (Agilent Technology). Separations were performed using serially connected size exclusion columns (5  $\mu\text{m}$ , Agilent Technology) using DMF containing 0.05 M LiBr as the mobile phase. The MWs were determined based on the  $dn/dc$  value of polymers calculated offline by using the internal calibration system processed by the same software. Circular dichroism (CD) experiments were performed on a JASCO J-815 CD spectrometer. Polypeptides were dissolved in deionized (DI) water at the concentrations of 0.02 mg/mL. The solution was placed in a quartz cell with a light path of 2 mm. The mean residue molar ellipticity of each polypeptide was calculated based on the measured apparent ellipticity by the following equation: Ellipticity ( $[\theta]$  in  $\text{deg}\cdot\text{cm}^2\cdot\text{dmol}^{-1}$ ) = (millidegrees  $\times$  mean residue weight)/(pathlength in millimeters concentration of polypeptide in  $\text{mg mL}^{-1}$ ). The helicity of the polypeptides was calculated by the following formula: helicity =  $(-[\theta_{222}] + 3000)/39000$ .<sup>1</sup>

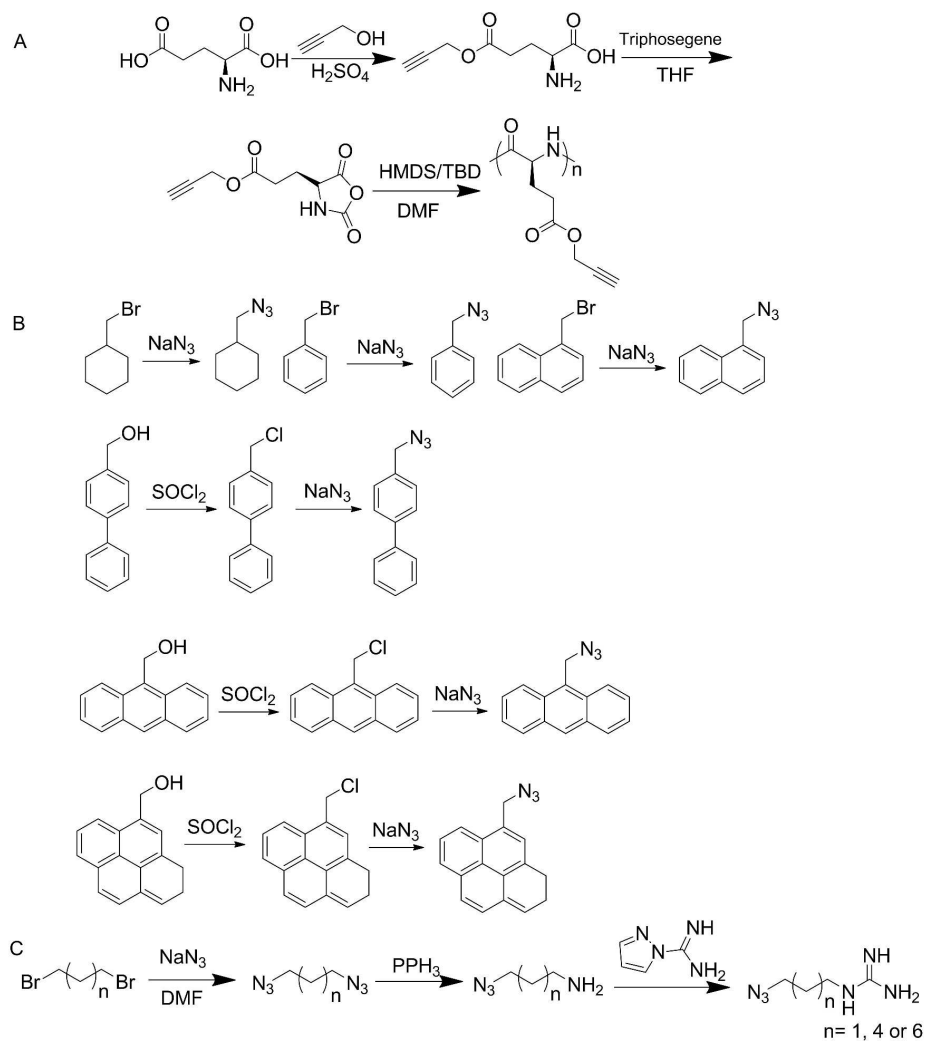

**Scheme S1.** Synthetic routes of alkyne-containing polypeptides (A), small molecular aliphatic and aromatic azides (B), and azide-guanidine small molecules.

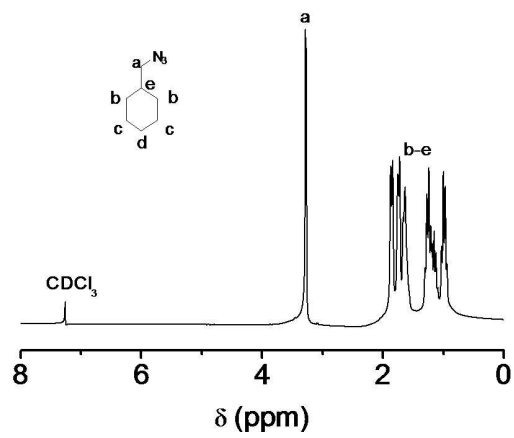

**Figure S1.**  $^1\text{H}$  NMR spectrum of  $\text{Cy-N}_3$  ( $\text{CDCl}_3$ , 400 MHz).

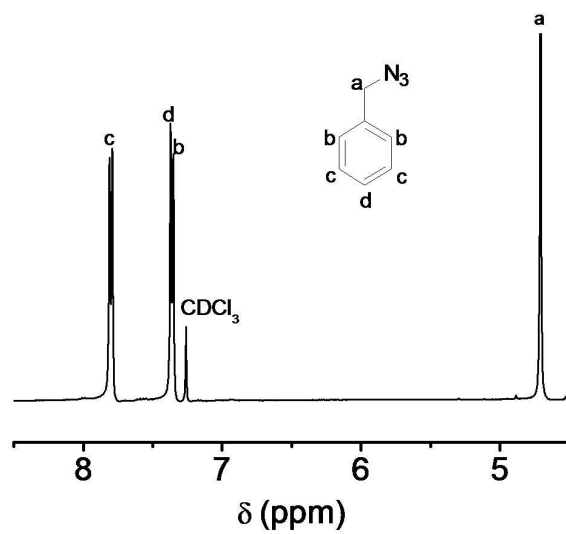

**Figure S2.**  $^1\text{H}$  NMR spectrum of  $\text{Bn-N}_3$  ( $\text{CDCl}_3$ , 400 MHz).

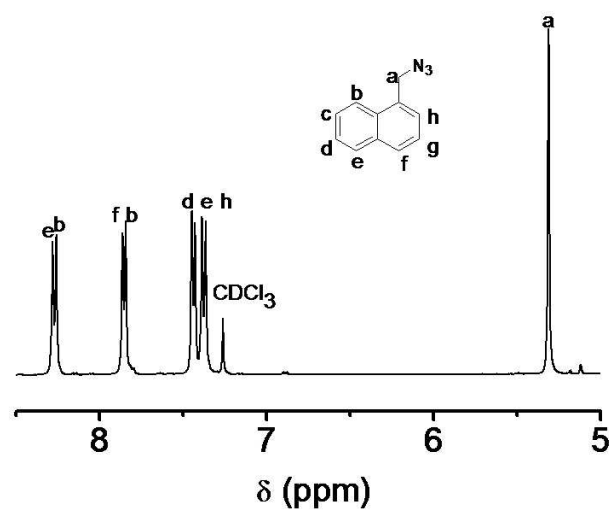

**Figure S3.**  $^1\text{H}$  NMR spectrum of Naph- $\text{N}_3$  ( $\text{CDCl}_3$ , 400 MHz).

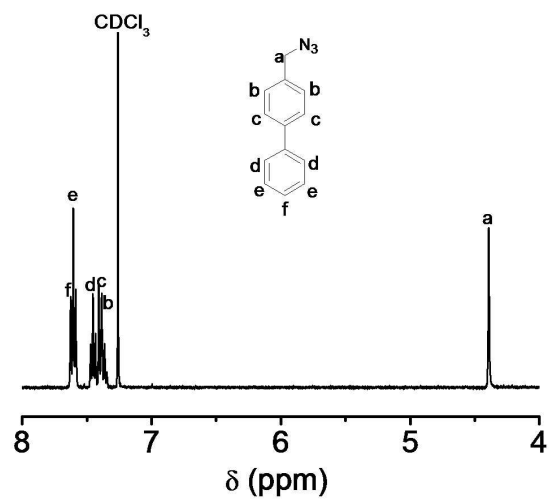

**Figure S4.**  $^1\text{H}$  NMR spectrum of Biph- $\text{N}_3$  ( $\text{CDCl}_3$ , 400 MHz).

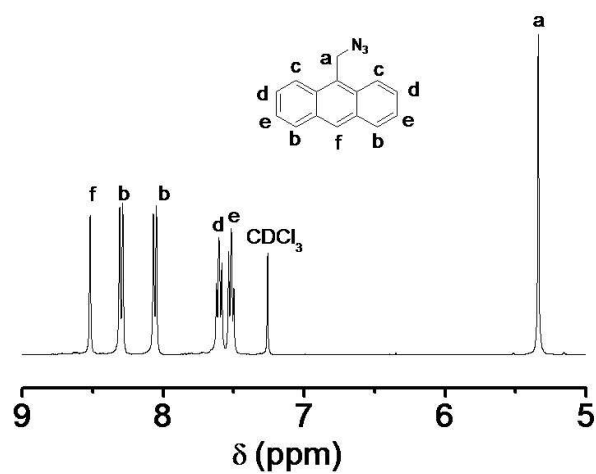

**Figure S5.**  $^1\text{H}$  NMR spectrum of Anth-N<sub>3</sub> (CDCl<sub>3</sub>, 400 MHz).



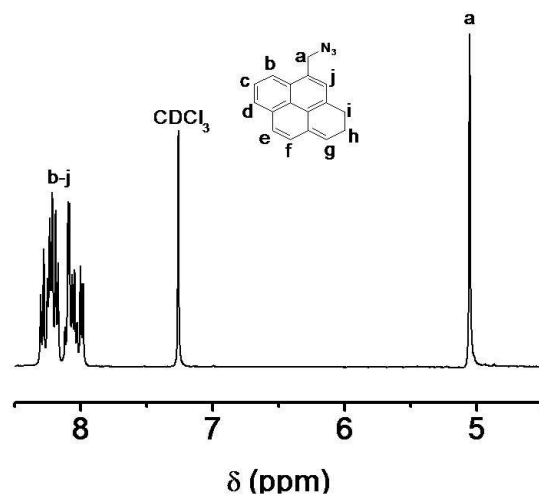

**Figure S6.**  $^1\text{H}$  NMR spectrum of Py- $\text{N}_3$  ( $\text{CDCl}_3$ , 400 MHz).

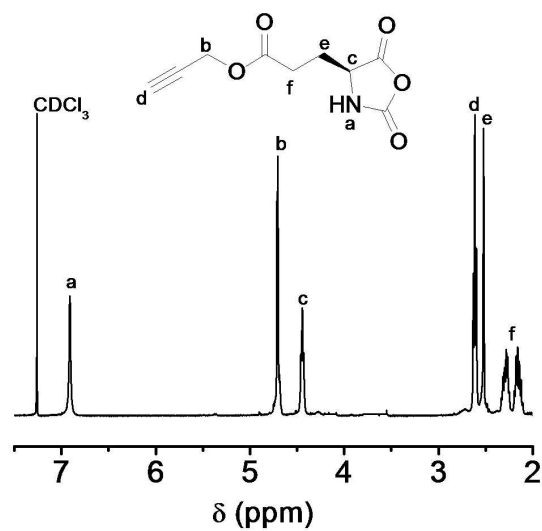

**Figure S7.**  $^1\text{H}$  NMR spectrum of PLG-NCA ( $\text{CDCl}_3$ , 400 MHz).

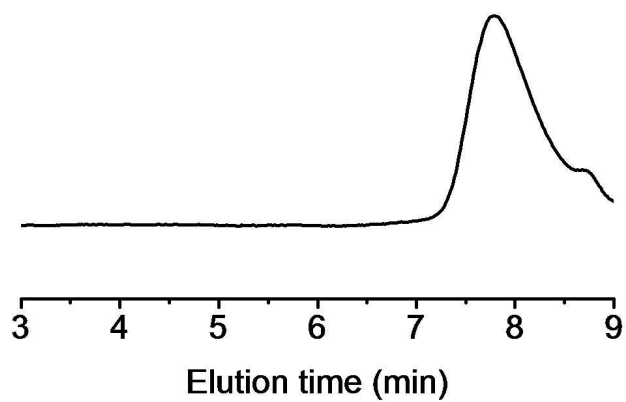

**Figure S8.** The GPC spectrum of polymer PPLG.

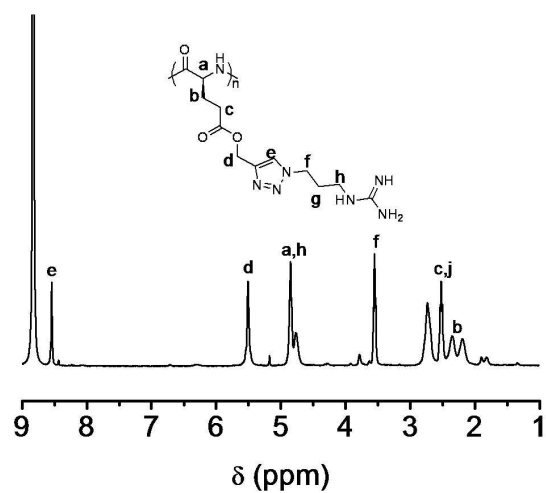

**Figure S9.**  $^1\text{H}$  NMR spectrum of P1 (400 MHz, TFA- $d$ /D $_2$ O (v/v = 9/1)).

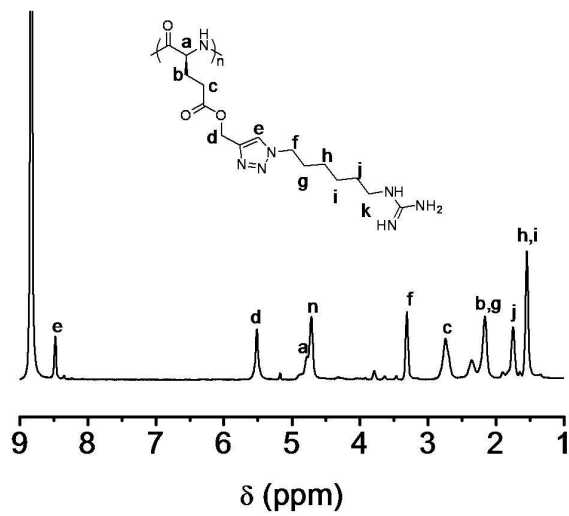

**Figure S10.**  $^1\text{H}$  NMR spectrum of P2 (400 MHz, TFA- $d_4$ /D $_2$ O (v/v = 9/1)).

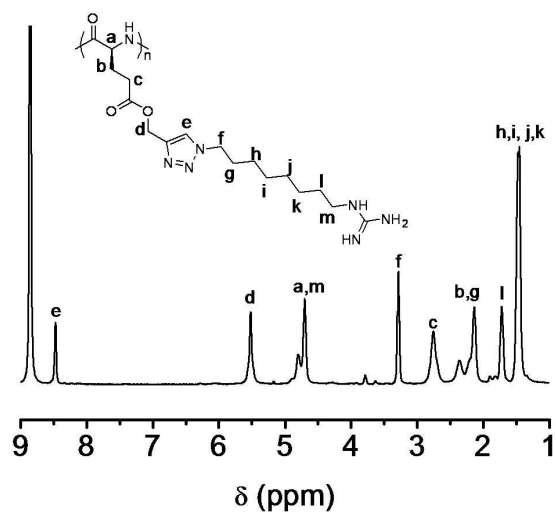

**Figure S11.**  $^1\text{H}$  NMR spectrum of P3 (400 MHz, TFA- $d$ /D $_2$ O (v/v = 9/1)).

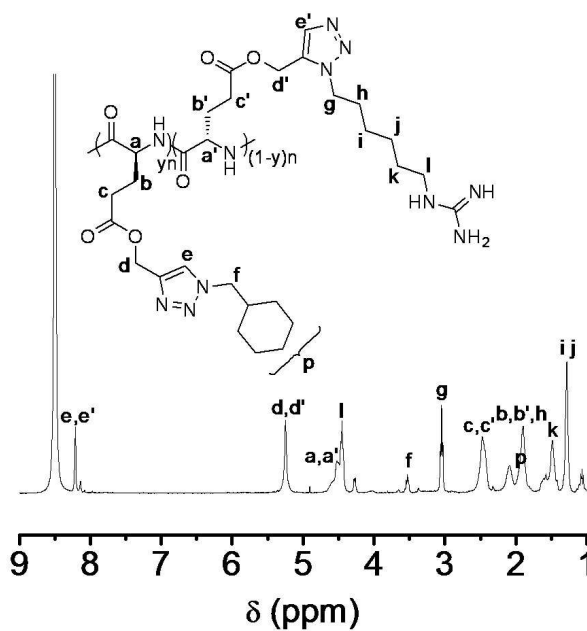

**Figure S12.**  $^1\text{H}$  NMR spectrum of Cy10 (400 MHz, TFA- $d$ /D $_2$ O (v/v = 9/1)).

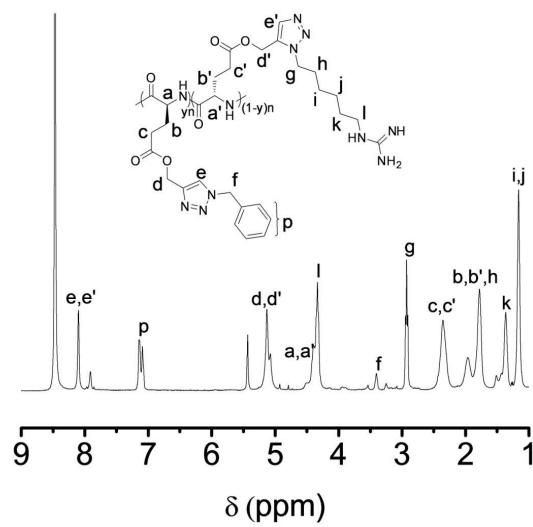

**Figure S13.**  $^1\text{H}$  NMR spectrum of Bn10 (400 MHz, TFA- $\text{d}_3/\text{D}_2\text{O}$  (v/v = 9/1)).



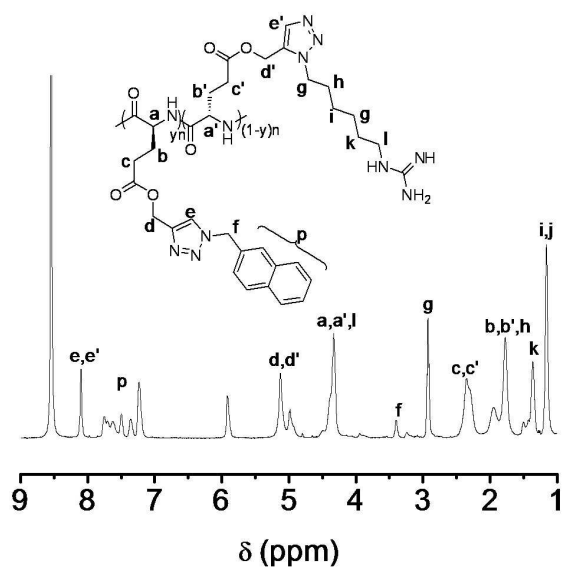

**Figure S14.**  $^1\text{H}$  NMR spectrum of Naph10 (400 MHz, TFA- $d_4$ /D $_2$ O (v/v = 9/1)).

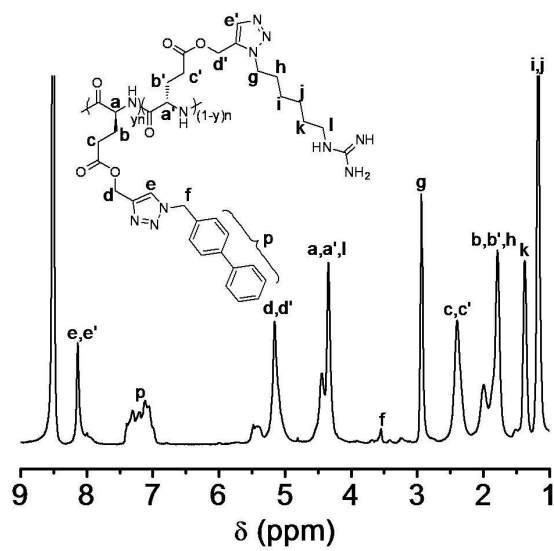

**Figure S15.**  $^1\text{H}$  NMR spectrum of Biph10 (400 MHz, TFA- $d_4$ /D $_2$ O (v/v = 9/1)).

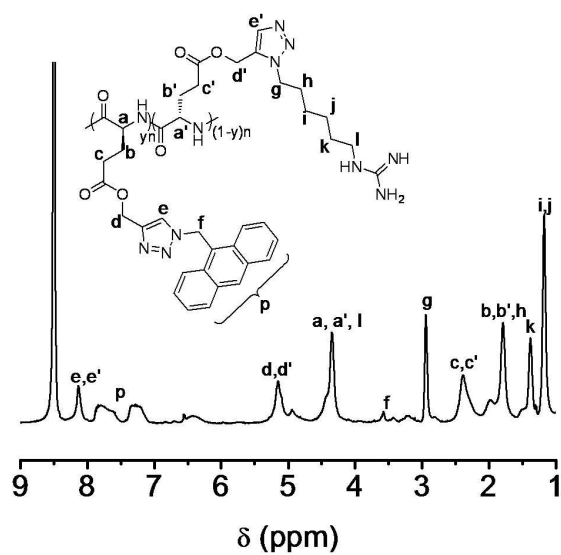

**Figure S16.**  $^1\text{H}$  NMR spectrum of Anth10 (400 MHz, TFA- $d_4$ /D $_2$ O (v/v = 9/1)).

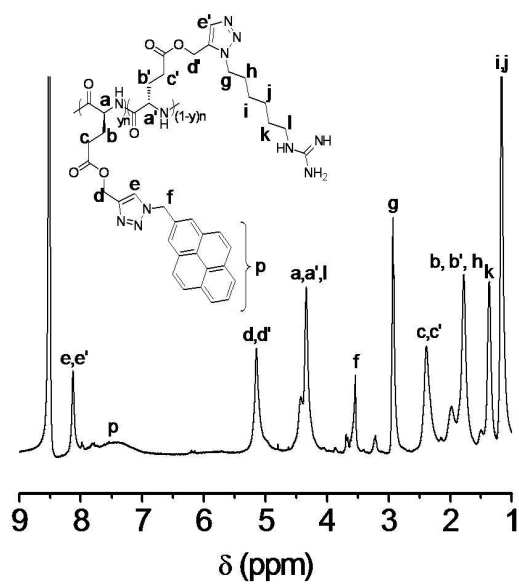

**Figure S17.**  $^1\text{H}$  NMR spectrum of Py10 (400 MHz, TFA- $d_4$ /D $_2$ O (v/v = 9/1)).

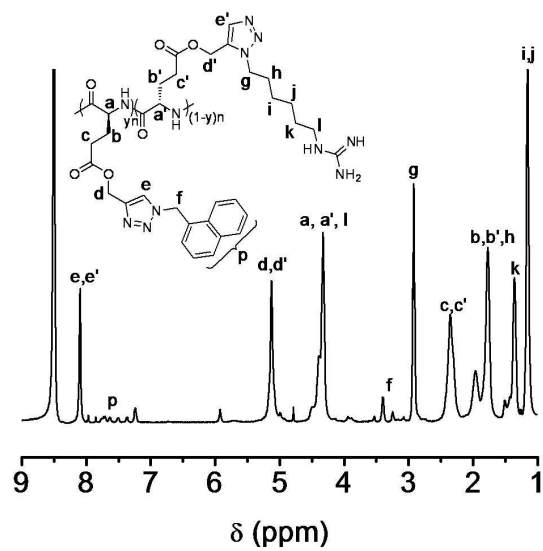

**Figure S18.**  $^1\text{H}$  NMR spectrum of Naph2 (400 MHz, TFA- $d_4$ /D $_2$ O (v/v = 9/1)).

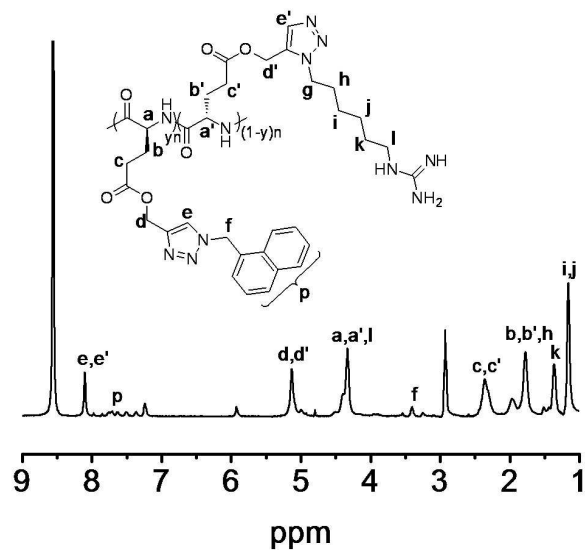

**Figure S19.** <sup>1</sup>H NMR spectrum of Naph5 (400 MHz, TFA-d/D<sub>2</sub>O (v/v = 9/1)).

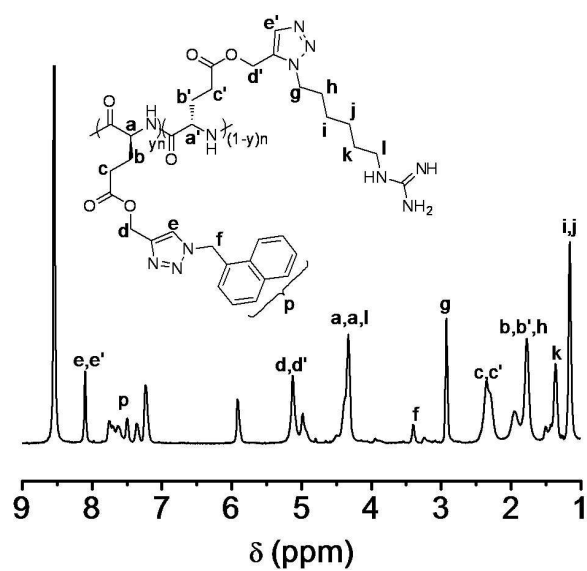

**Figure S20.**  $^1\text{H}$  NMR spectrum of Naph15 (400 MHz, TFA- $d_4$ /D $_2$ O (v/v = 9/1)).

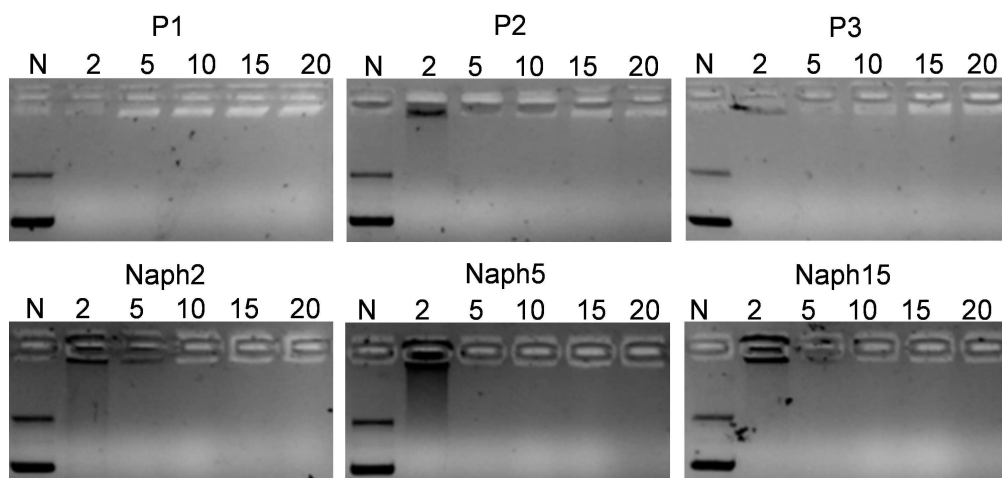

**Figure S21.** DNA condensation by polypeptides at various polymer/DNA weight ratios. N represents naked DNA.



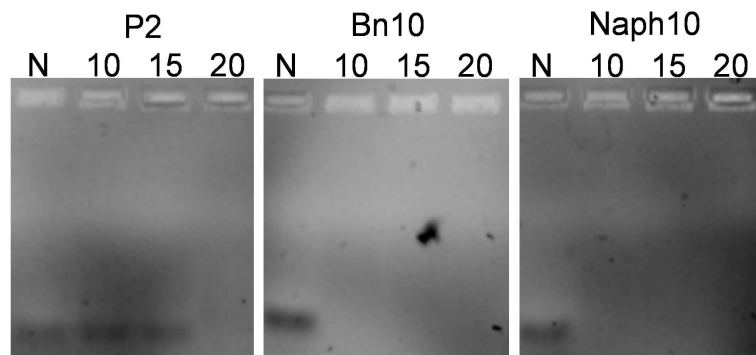

**Figure S22.** siRNA condensation by polypeptides at various polymer/siRNA weight ratios. N represents naked siRNA.

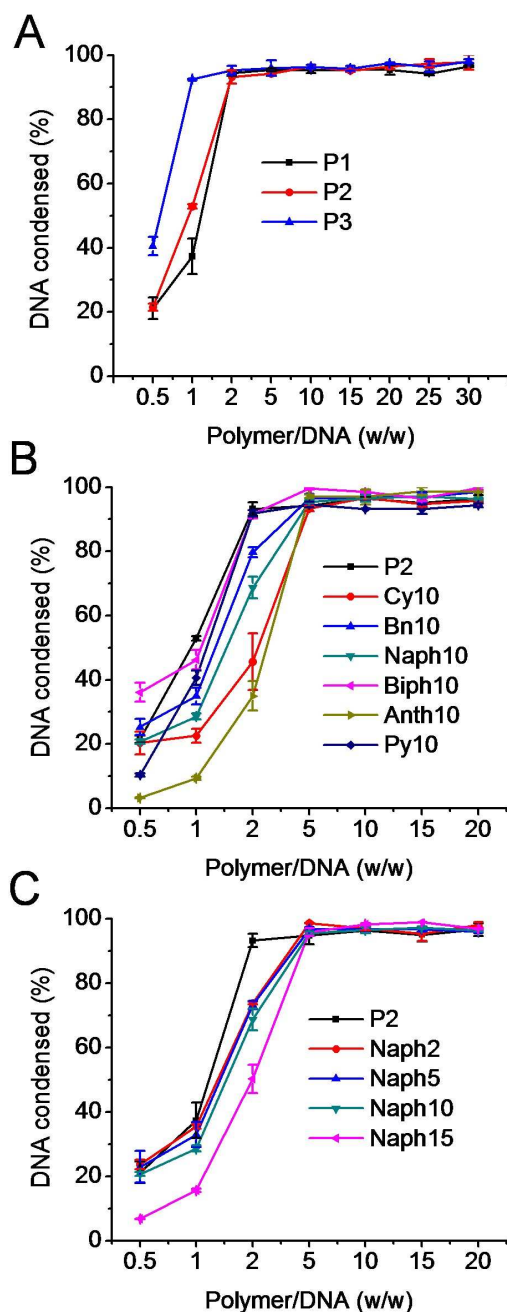

**Figure S23.** DNA condensation levels of polypeptides at various polymer/DNA weight ratios. (A) Homopolypeptides with various triazole-to-guanidine spacer lengths (P1-P3). (B) P2 and co-polypeptides with various aliphatic (Cy10) or aromatic (Bn10, Naph10, Biph10, Anth10, and Py10) side chains at the fixed molar content of 10%. (C) Polypeptides with different molar contents of naphthyl groups on side chains (P2, Naph2, Naph5, Naph10, and Naph15) ( $n = 3$ ).

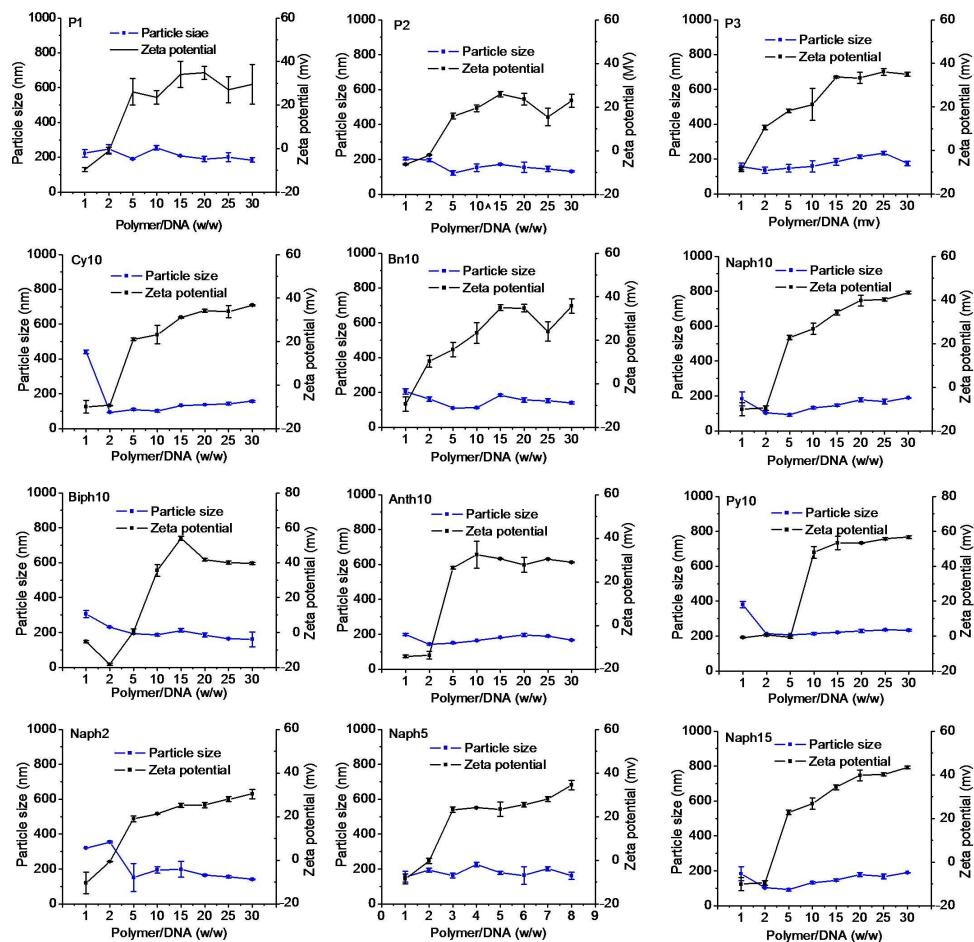

**Figure S24.** Size and zeta potential of polypeptide/DNA polyplexes at various weight ratios.

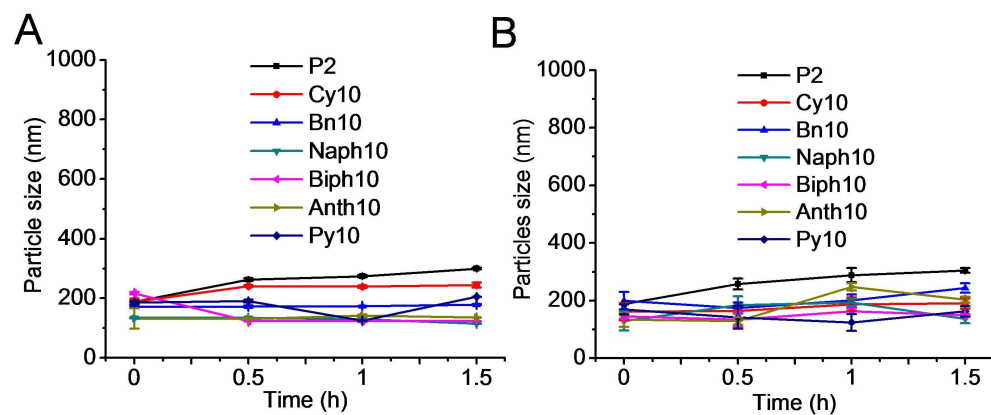

**Figure S25.** Alteration of particle size of polypeptides/DNA polyplexes (w/w = 20, prepared in DEPC) upon dilution with PBS (A) and 10% FBS (B) (10 fold).

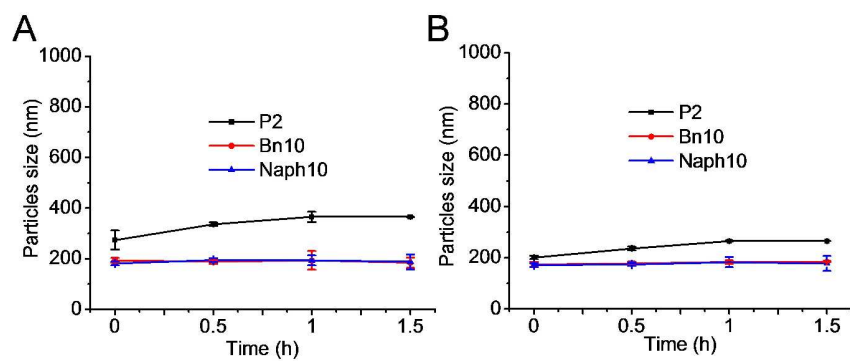

**Figure S26.** Alteration of particle size of polypeptides/siRNA polyplexes (w/w = 20, prepared in DEPC) upon dilution with PBS (A) and 10% FBS (B) (10 fold).

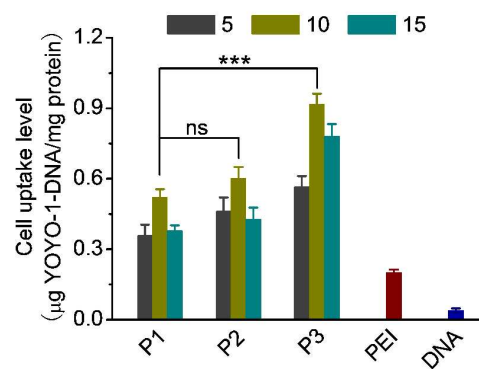

**Figure S27.** Uptake level of polypeptide/YOYO-1-DNA polyplexes at different polymer/DNA weight ratios (0.1  $\mu\text{g}$  DNA/well) following incubation for 4 h at 37  $^{\circ}\text{C}$  in HeLa cells ( $n = 3$ ).

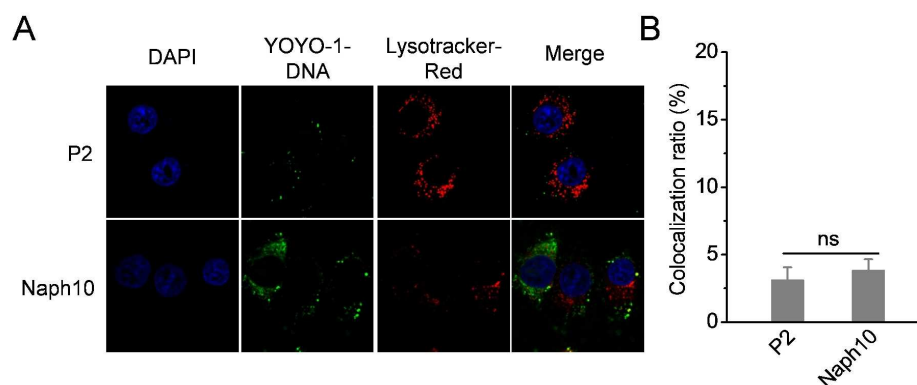

**Figure S28.** Intracellular distribution of polypeptide/DNA polyplexes in HeLa cells. (A) CLSM images of cells treated with Naph10/YOYO-1-DNA and P2/YOYO-1-DNA complexes (w/w = 10) for 4 h at 4 °C. Cell nuclei were stained with DAPI, and endosomes/lysosomes were stained with LysotrackerRed (bar = 20  $\mu$ m). (B) Colocalization ratios between YOYO-1-DNA and Lysotracker Red-stained endosomes as calculated from CLSM images (n = 50).

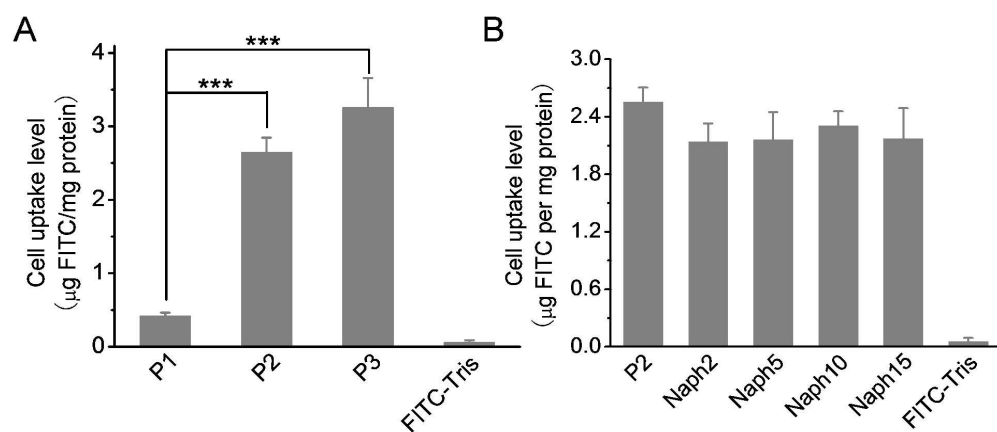

**Figure S29.** Uptake level of FITC-Tris in HeLa cells following co-incubation with polypeptides for 2 h at 37 °C. (A) Homopolypeptides with various triazole-to-guanidine spacer lengths (P1-P3). (B) Polypeptides with different molar contents of naphthyl groups on side chains (P2, Naph2, Naph5, Naph10, and Naph15) (n = 3).



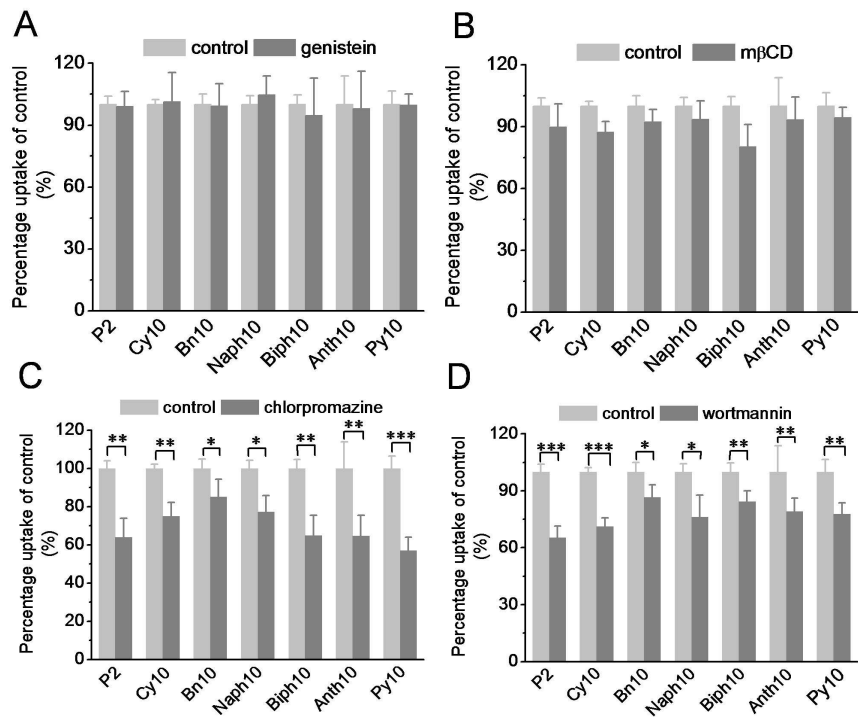

**Figure S30.** Uptake level of polypeptide/DNA polyplexes in HeLa cells in the presence of various endocytic inhibitors including genistein (A), mβCD (B), chlorpromazine (C), and wortmannin (D) (n = 3).

**Table S1.** Sequences of TNF- $\alpha$  and Scramble siRNA (Scr)

|                         | Sequence                                        |
|-------------------------|-------------------------------------------------|
| TNF- $\alpha$ sense     | 5'-GUCUCAGCCUCUUCUCAUCCUGCT-3'                  |
| TNF- $\alpha$ antisense | 5'-AGCAGGAAmUGmAAmGAmGGmGGmCUmGAmGACm<br>AmU-3' |
| Scr sense               | 5'-UUC UCC GAA CGU GUC ACG UTT-3'               |
| Scr antisense           | 5'-ACG UGA CAC GUU CGG AGA ATT-3'               |

**Table S2.** Primer sequences of TNF- $\alpha$  and 36B4

|                 | Sequence                  |
|-----------------|---------------------------|
| TNF- $\alpha$ F | CCCTCACA CT CAGATCATCTTCT |
| TNF- $\alpha$ R | GCTACGACGTGGGCTACAG       |
| 36B4 F          | TCCAGGCTTTGGGCATCAC       |
| 36B4 R          | CTTTATCAGCTGCACATCACTCAGA |

## REFERENCE

1. Zhang, R.; Zheng, N.; Song, Z.; Yin, L.; Cheng, J. The Effect of Side-Chain Functionality and Hydrophobicity on the Gene Delivery Capabilities of Cationic Helical Polypeptides. *Biomaterials* **2014**, *35*, 3443-3454.
